# Supplementary material for: Assessing the Occurrence and Influence of Cancer Chemotherapy-Related Pharmacogenetic Alleles in the Chilean Population
Source: MDPI journal article supplement (doi:10.3390/pharmaceutics16040561), 2024-04-19
Supplement: s1 [file s1]

## Supplementary Materials

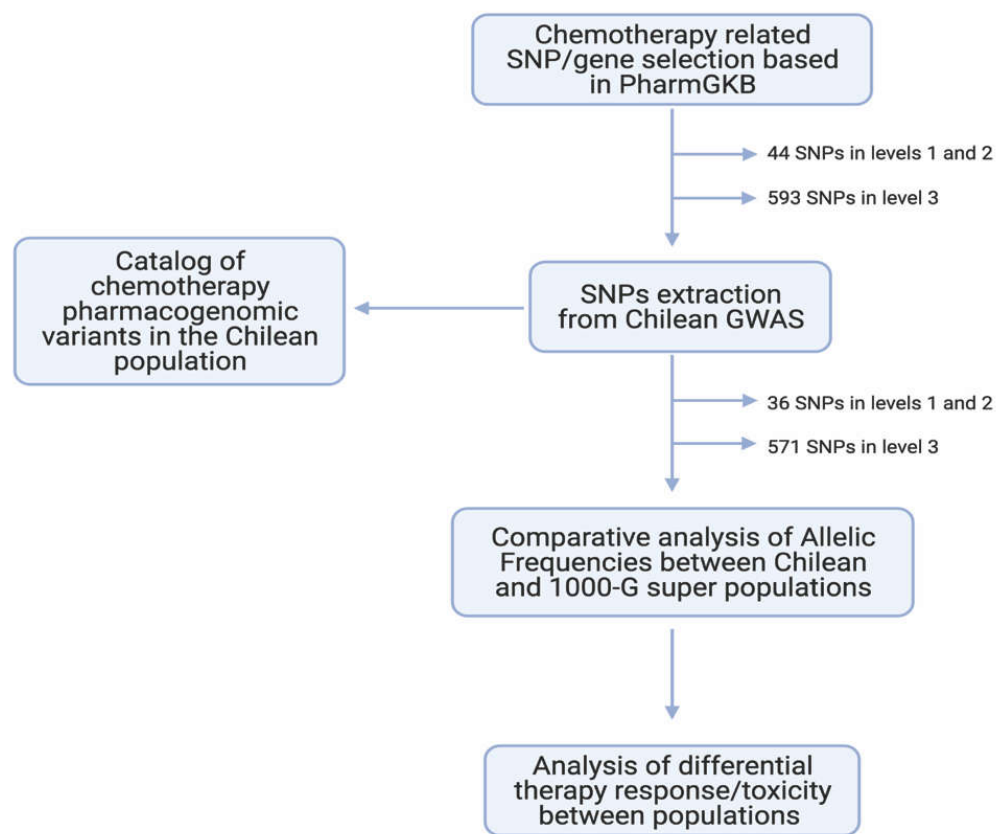

**Figure S1.** General design of the study. PharmGKB database was used for the SNP selection related to response/toxicity of cancer therapy. Then, allelic frequencies of selected SNPs were extracted from Chilean GWAS of 1095 non-cancerous subjects, and significant differences were established with respect to the 5 super populations of 1000G-project. Finally, a discussion with relevant literature was performed.

Table S1. Minor allele frequencies of pharmacogene SNPs level of evidence 1 and 2.

| Gene           | SNP         | MA      | CHI   | AMR   | EUR   | EAS   | SAS   | AFR   |
|----------------|-------------|---------|-------|-------|-------|-------|-------|-------|
| <i>ABCB1</i>   | rs1045642   | A       | 0.394 | 0.428 | 0.514 | 0.399 | 0.576 | 0.151 |
| <i>ACYP2</i>   | rs1872328   | A       | 0.023 | 0.043 | 0.038 | 0.012 | 0.017 | 0.198 |
| <i>C8orf34</i> | rs1517114   | C       | 0.400 | 0.338 | 0.356 | 0.122 | 0.309 | 0.424 |
| <i>CBR3</i>    | rs1056892   | A       | 0.278 | 0.260 | 0.355 | 0.400 | 0.530 | 0.509 |
| <i>CEP72</i>   | rs924607    | T       | 0.399 | 0.319 | 0.409 | 0.305 | 0.376 | 0.077 |
| <i>CYP2A6</i>  | rs1801272   | T       | 0.018 | 0.007 | 0.034 | 0.000 | 0.006 | 0.001 |
| <i>CYP2A6</i>  | rs28399433  | C       | 0.092 | 0.099 | 0.072 | 0.235 | 0.153 | 0.083 |
| <i>CYP2A6</i>  | rs28399454  | T       | 0.001 | 0.006 | 0.000 | 0.001 | 0.000 | 0.116 |
| <i>CYP2D6</i>  | rs28371725  | T       | 0.050 | ND    | ND    | ND    | ND    | ND    |
| <i>CYP2D6</i>  | rs35742686  | C       | 0.007 | ND    | ND    | ND    | ND    | ND    |
| <i>CYP2D6</i>  | rs3892097   | T       | 0.140 | ND    | ND    | ND    | ND    | ND    |
| <i>CYP2D6</i>  | rs5030655   | C       | 0.005 | ND    | ND    | ND    | ND    | ND    |
| <i>CYP2D6</i>  | rs1065852   | A       | 0.153 | ND    | ND    | ND    | ND    | ND    |
| <i>DPYD</i>    | rs75017182  | C       | 0.005 | 0.006 | 0.024 | 0.000 | 0.019 | 0.001 |
| <i>DPYD</i>    | rs67376798  | A       | 0.003 | 0.003 | 0.007 | 0.000 | 0.001 | 0.001 |
| <i>ERCC1</i>   | rs11615     | A       | 0.401 | 0.388 | 0.619 | 0.262 | 0.460 | 0.036 |
| <i>ERCC1</i>   | rs3212986   | A       | 0.390 | 0.353 | 0.251 | 0.300 | 0.299 | 0.291 |
| <i>FCGR2A</i>  | rs1801274   | G       | 0.406 | 0.451 | 0.513 | 0.278 | 0.419 | 0.527 |
| <i>FCGR3A</i>  | rs396991    | C       | 0.323 | 0.267 | 0.360 | 0.373 | 0.331 | 0.326 |
| <i>GSTP1</i>   | rs1695      | G       | 0.426 | 0.474 | 0.330 | 0.180 | 0.294 | 0.484 |
| <i>MTHFR</i>   | rs1801133   | A       | 0.426 | ND    | ND    | ND    | ND    | ND    |
| <i>NQO1</i>    | rs1800566   | A       | 0.407 | 0.332 | 0.211 | 0.419 | 0.358 | 0.176 |
| <i>NT5C2</i>   | rs11598702  | C       | 0.314 | 0.309 | 0.349 | 0.233 | 0.236 | 0.186 |
| <i>NUDT15</i>  | rs116855232 | T       | 0.062 | 0.045 | 0.003 | 0.094 | 0.070 | 0.001 |
| <i>NUDT15</i>  | rs147390019 | A       | 0.004 | 0.009 | 0.000 | 0.001 | 0.000 | 0.000 |
| <i>NUDT15</i>  | rs869320766 | AGGAGTC | 0.061 | ND    | ND    | ND    | ND    | ND    |
| <i>SEMA3C</i>  | rs7779029   | C       | 0.061 | 0.082 | 0.045 | 0.152 | 0.107 | 0.360 |
| <i>SLC28A3</i> | rs885004    | A       | 0.182 | 0.201 | 0.129 | 0.159 | 0.102 | 0.100 |

|                |            |   |       |       |       |       |       |       |
|----------------|------------|---|-------|-------|-------|-------|-------|-------|
| <i>SLC28A3</i> | rs7853758  | A | 0.191 | 0.233 | 0.142 | 0.155 | 0.112 | 0.339 |
| <i>SLCO1B1</i> | rs11045879 | C | 0.135 | 0.174 | 0.193 | 0.450 | 0.081 | 0.187 |
| <i>TPMT</i>    | rs1800462  | G | 0.001 | 0.006 | 0.007 | 0.000 | 0.000 | 0.001 |
| <i>TPMT</i>    | rs1142345  | C | 0.037 | 0.057 | 0.029 | 0.021 | 0.017 | 0.066 |
| <i>TPMT</i>    | rs1800460  | T | 0.031 | 0.040 | 0.028 | 0.000 | 0.004 | 0.003 |
| <i>UGT1A1</i>  | rs4148323  | A | 0.025 | 0.011 | 0.007 | 0.136 | 0.017 | 0.001 |
| <i>UGT1A9</i>  | rs3832043  | A | 0.448 | ND    | ND    | ND    | ND    | ND    |
| <i>XRCC1</i>   | rs25487    | T | 0.243 | 0.313 | 0.361 | 0.236 | 0.343 | 0.110 |

*MA* = minor allele, *CHI* = Chilean, *AMR* = Admixed Americans, *EUR* = Europeans, *EAS* = East Asians, *SAS* = South Asians, and *AFR* = Africans, *ND* = No data

Table S2. Significant SNPs showing positive association with Mapuche-Huilliche ancestry.

| Gene           | SNP         | MA      | Test | Beta     | SE       | L95       | U95      | Stat  | P         |
|----------------|-------------|---------|------|----------|----------|-----------|----------|-------|-----------|
| <i>ABCB1</i>   | rs2235047   | C       | ADD  | 0.006306 | 0.001775 | 0.002827  | 0.009785 | 3.553 | 0.0003974 |
| <i>NUDT15</i>  | rs116855232 | T       | ADD  | 0.01086  | 0.00307  | 0.004847  | 0.01688  | 3.539 | 0.0004187 |
| <i>NAT2</i>    | rs1799931   | A       | ADD  | 0.006863 | 0.002291 | 0.002373  | 0.01135  | 2.996 | 0.002799  |
| <i>RAD52</i>   | rs11226     | A       | ADD  | 0.00446  | 0.001493 | 0.001533  | 0.007387 | 2.986 | 0.002885  |
| <i>NT5C3A</i>  | rs3750117   | A       | ADD  | 0.004406 | 0.001486 | 0.001494  | 0.007318 | 2.966 | 0.003084  |
| <i>RXRA</i>    | rs2234753   | G       | ADD  | 0.004488 | 0.001517 | 0.001516  | 0.007461 | 2.96  | 0.003148  |
| <i>DROSHA</i>  | rs639174    | T       | ADD  | 0.004147 | 0.001489 | 0.001229  | 0.007064 | 2.786 | 0.005437  |
| <i>KCNQ5</i>   | rs9351963   | C       | ADD  | 0.004425 | 0.001616 | 0.001258  | 0.007593 | 2.738 | 0.006282  |
| <i>TP53</i>    | rs4968187   | T       | ADD  | 0.004785 | 0.00176  | 0.001336  | 0.008235 | 2.719 | 0.006654  |
| <i>NUDT15</i>  | rs869320766 | AGGAGTC | ADD  | 0.008037 | 0.003133 | 0.001898  | 0.01418  | 2.566 | 0.01043   |
| <i>FKBP15</i>  | rs4978536   | G       | ADD  | 0.003858 | 0.001548 | 0.0008248 | 0.006891 | 2.493 | 0.01282   |
| <i>CYP1A1</i>  | rs1048943   | C       | ADD  | 0.003803 | 0.001584 | 0.0006978 | 0.006908 | 2.4   | 0.01654   |
| <i>CCAT2</i>   | rs6983267   | T       | ADD  | 0.003469 | 0.001481 | 0.0005669 | 0.006371 | 2.343 | 0.01932   |
| <i>SLCO1B1</i> | rs10841753  | C       | ADD  | 0.003701 | 0.001651 | 0.0004648 | 0.006937 | 2.241 | 0.0252    |
| <i>HOTAIR</i>  | rs7958904   | C       | ADD  | 0.003177 | 0.001488 | 0.0002615 | 0.006093 | 2.136 | 0.03293   |

|                |           |   |     |          |          |           |          |       |         |
|----------------|-----------|---|-----|----------|----------|-----------|----------|-------|---------|
| <i>BCL2L11</i> | rs724710  | T | ADD | 0.003154 | 0.001492 | 0.0002297 | 0.006079 | 2.114 | 0.03475 |
| <i>NQO1</i>    | rs1800566 | A | ADD | 0.003037 | 0.00148  | 0.0001372 | 0.005937 | 2.053 | 0.04034 |
| <i>EPHX1</i>   | rs1051740 | C | ADD | 0.003012 | 0.001509 | 5.44E-05  | 0.00597  | 1.996 | 0.04618 |

*MA* = minor allele, *Test* = linear additive test, *Beta* = effect size, *SE* = standard error of beta, *L95* = 95% confidence interval (lower bound), *U95* = 95% confidence interval (upper bound), *Stat* = regression statistic.

Table S3. Significant SNPs showing positive association with European ancestry.

| Gene                           | SNP         | MA | Test | Beta     | SE       | L95       | U95      | Stat  | P         |
|--------------------------------|-------------|----|------|----------|----------|-----------|----------|-------|-----------|
| <i>GSTA1</i>                   | rs3957357   | A  | ADD  | 0.007623 | 0.001642 | 0.004405  | 0.01084  | 4.642 | 3.87E-06  |
| <i>PARD3B</i>                  | rs17626122  | T  | ADD  | 0.005688 | 0.001507 | 0.002734  | 0.008642 | 3.774 | 0.0001693 |
| <i>NALCN</i>                   | rs7992226   | G  | ADD  | 0.006763 | 0.001861 | 0.003116  | 0.01041  | 3.634 | 0.0002918 |
| <i>FOXO1; MIR320D1</i>         | rs144991623 | T  | ADD  | 0.05285  | 0.01525  | 0.02296   | 0.08273  | 3.466 | 0.0005492 |
| <i>OTOS</i>                    | rs2291767   | C  | ADD  | 0.01767  | 0.005487 | 0.006913  | 0.02842  | 3.22  | 0.001321  |
| <i>GSTP1</i>                   | rs1138272   | T  | ADD  | 0.01308  | 0.004149 | 0.004945  | 0.02121  | 3.152 | 0.001667  |
| <i>UBE2I</i>                   | rs9597      | G  | ADD  | 0.01575  | 0.005144 | 0.005669  | 0.02583  | 3.062 | 0.002252  |
| <i>KDR</i>                     | rs2071559   | G  | ADD  | 0.004373 | 0.0015   | 0.001433  | 0.007314 | 2.915 | 0.003633  |
| <i>ABCC1</i>                   | rs17501331  | G  | ADD  | 0.008602 | 0.003033 | 0.002657  | 0.01455  | 2.836 | 0.004655  |
| <i>CYBA</i>                    | rs4673      | A  | ADD  | 0.004563 | 0.00168  | 0.001271  | 0.007855 | 2.716 | 0.006706  |
| <i>CYP1A2</i>                  | rs2472304   | A  | ADD  | 0.004139 | 0.001528 | 0.001144  | 0.007135 | 2.708 | 0.00687   |
| <i>NOS3</i>                    | rs1799983   | T  | ADD  | 0.004863 | 0.001796 | 0.001342  | 0.008384 | 2.707 | 0.006899  |
| <i>XPC</i>                     | rs2228001   | G  | ADD  | 0.004206 | 0.001604 | 0.001062  | 0.007351 | 2.622 | 0.008864  |
| <i>IRX5; IRX6</i>              | rs9936750   | C  | ADD  | 0.006143 | 0.00237  | 0.001497  | 0.01079  | 2.591 | 0.009685  |
| <i>MUTYH</i>                   | rs3219484   | T  | ADD  | 0.01224  | 0.004814 | 0.002803  | 0.02168  | 2.542 | 0.01115   |
| <i>FKBP15</i>                  | rs4979223   | A  | ADD  | 0.003689 | 0.001493 | 0.0007634 | 0.006615 | 2.471 | 0.01361   |
| <i>LOC102723649; LINC02539</i> | rs6920220   | A  | ADD  | 0.005496 | 0.002257 | 0.001072  | 0.009919 | 2.435 | 0.01505   |
| <i>WWOX; MAF</i>               | rs4888024   | A  | ADD  | 0.003505 | 0.001447 | 0.0006698 | 0.00634  | 2.423 | 0.01556   |
| <i>PIN1</i>                    | rs2233678   | C  | ADD  | 0.00625  | 0.002605 | 0.001144  | 0.01136  | 2.399 | 0.0166    |
| <i>FLT4</i>                    | rs307821    | A  | ADD  | 0.007445 | 0.003108 | 0.001353  | 0.01354  | 2.395 | 0.01677   |

|                       |             |   |     |          |          |           |          |       |         |
|-----------------------|-------------|---|-----|----------|----------|-----------|----------|-------|---------|
| <i>PERP; ARFGEF3</i>  | rs117101815 | T | ADD | 0.01013  | 0.004239 | 0.001822  | 0.01844  | 2.39  | 0.01703 |
| <i>PERP; ARFGEF3</i>  | rs9402944   | T | ADD | 0.01013  | 0.004239 | 0.001822  | 0.01844  | 2.39  | 0.01703 |
| <i>KDR</i>            | rs2239702   | T | ADD | 0.004043 | 0.00172  | 0.0006718 | 0.007414 | 2.351 | 0.01892 |
| <i>PERP; ARFGEF3</i>  | rs78428806  | A | ADD | 0.01     | 0.004266 | 0.001642  | 0.01836  | 2.345 | 0.01921 |
| <i>COMT</i>           | rs4646316   | T | ADD | 0.00445  | 0.001907 | 0.0007122 | 0.008188 | 2.333 | 0.01981 |
| <i>ABCC2</i>          | rs717620    | T | ADD | 0.004791 | 0.002068 | 0.0007383 | 0.008844 | 2.317 | 0.02069 |
| <i>ABCC2</i>          | rs2273697   | A | ADD | 0.004736 | 0.002088 | 0.0006437 | 0.008828 | 2.268 | 0.02351 |
| <i>XYLT2</i>          | rs6504649   | G | ADD | 0.003653 | 0.00164  | 0.0004389 | 0.006867 | 2.228 | 0.02611 |
| <i>PACSIN2</i>        | rs2413739   | T | ADD | 0.003455 | 0.001609 | 0.0003011 | 0.006608 | 2.147 | 0.03201 |
| <i>MTRR</i>           | rs1801394   | G | ADD | 0.003335 | 0.001559 | 0.0002791 | 0.006391 | 2.139 | 0.03266 |
| <i>SLC22A4</i>        | rs1050152   | T | ADD | 0.00363  | 0.001724 | 0.0002522 | 0.007009 | 2.106 | 0.03541 |
| <i>EGFR</i>           | rs712829    | T | ADD | 0.003538 | 0.001698 | 0.000211  | 0.006865 | 2.084 | 0.03737 |
| <i>NFKBIA</i>         | rs2233409   | A | ADD | 0.004541 | 0.002188 | 0.0002525 | 0.008829 | 2.075 | 0.03819 |
| <i>XRCC3</i>          | rs861539    | A | ADD | 0.003671 | 0.001771 | 0.000199  | 0.007143 | 2.072 | 0.03847 |
| <i>SLC31A1</i>        | rs10981694  | G | ADD | 0.004685 | 0.002262 | 0.0002504 | 0.009119 | 2.071 | 0.03863 |
| <i>DCK</i>            | rs80143932  | G | ADD | 0.005395 | 0.002644 | 0.0002118 | 0.01058  | 2.04  | 0.04159 |
| <i>DCK</i>            | rs2306744   | T | ADD | 0.005395 | 0.002644 | 0.0002118 | 0.01058  | 2.04  | 0.04159 |
| <i>E2F7</i>           | rs310786    | C | ADD | 0.003483 | 0.001709 | 0.0001331 | 0.006832 | 2.038 | 0.04181 |
| <i>LINC02247;RXRA</i> | rs62576288  | A | ADD | 0.006378 | 0.003131 | 0.000242  | 0.01251  | 2.037 | 0.04187 |
| <i>NCF4-AS1</i>       | rs1883112   | G | ADD | 0.00299  | 0.001512 | 2.68E-05  | 0.005954 | 1.978 | 0.04821 |
| <i>SLC31A1</i>        | rs7851395   | A | ADD | 0.002974 | 0.001507 | 1.95E-05  | 0.005928 | 1.973 | 0.04876 |

*MA* = minor allele, *Test* = linear additive test, *Beta* = effect size, *SE* = standard error of beta, *L95* = 95% confidence interval (lower bound), *U95* = 95% confidence interval (upper bound), *Stat* = regression statistic.

Table S4: Significant pharmacogenes SNPs related to European ancestry in the Chilean cohort.

| Gene   | SNP        | P*      | MA | LoE | Drug                                                                                                         | PharmGKB annotations**                                                                                                                                                                                                                                                                                                                                                                                                                                                                                                                                                                                                                                                                                                                                                                                                                                                                                                                                                     |
|--------|------------|---------|----|-----|--------------------------------------------------------------------------------------------------------------|----------------------------------------------------------------------------------------------------------------------------------------------------------------------------------------------------------------------------------------------------------------------------------------------------------------------------------------------------------------------------------------------------------------------------------------------------------------------------------------------------------------------------------------------------------------------------------------------------------------------------------------------------------------------------------------------------------------------------------------------------------------------------------------------------------------------------------------------------------------------------------------------------------------------------------------------------------------------------|
| ABCC1  | rs17501331 | 0.00466 | G  | 3   | Irinotecan                                                                                                   | Patients with the AA genotype and colorectal neoplasms may have increased severity of neutropenia compared to patients with the AG and GG genotypes when taking irinotecan.                                                                                                                                                                                                                                                                                                                                                                                                                                                                                                                                                                                                                                                                                                                                                                                                |
| ABCC2  | rs717620   | 0.02069 | T  | 3   | Fluorouracil /<br>Leucovorin /<br>Oxaplatin /<br>Cisplatin /<br>Doxorubicin /<br>Methotrexate /<br>Sorafenib | Patients with TT genotype and colorectal cancer may have increased severity of neurotoxicity syndromes when treated with FOLFOX (fluorouracil, leucovorin, oxaliplatin) as compared to patients with CC or CT genotype.<br>Patients with the CC genotype and colon cancer may have an increased risk of thrombocytopenia when treated with FOLFOX as compared to patients with CT or TT genotype.<br>Patients with osteosarcoma and CT or TT genotype may have a decreased response to treatment with cisplatin, doxorubicin and methotrexate as compared to patients with the CC genotype.<br>Patients with the CC genotype may have increased risk of skin rash when treated with sorafenib in people with Carcinoma, Renal Cell as compared to patients with genotype CT or TT.<br>Patients with mesothelioma and the GG genotype may have worse overall and progression-free survival when treated with cisplatin as compared to patients with the AA or AG genotypes. |
| ABCC2  | rs2273697  | 0.02351 | A  | 3   | Cisplatin / Imatinib /<br>Cyclophosphamide /<br>Doxorubicin /<br>Fluorouracil                                | Patients with the GG genotype and gastrointestinal stromal tumors may have decreased progression-free survival times when treated with imatinib as compared to patients with the AA or AG genotype.<br>Patients with GG genotype and breast cancer may have an increased risk of anemia when treated with cyclophosphamide, doxorubicin and fluorouracil (FAC) as compared to patients with AA or AG genotype.                                                                                                                                                                                                                                                                                                                                                                                                                                                                                                                                                             |
| COMT   | rs4646316  | 0.01981 | T  | 3   | Cisplatin                                                                                                    | The TT genotype may be associated with increased likelihood of nephrotoxicity when treated with cisplatin as compared to the CT or TT genotype.<br>Cancer patients with the AA or AG genotypes who are treated with doxorubicin may have an increased risk for cardiotoxicity as compared to patients with the GG genotype.                                                                                                                                                                                                                                                                                                                                                                                                                                                                                                                                                                                                                                                |
| CYBA   | rs4673     | 0.00671 | A  | 3   | Doxorubicin /<br>Idarubicin / Cisplatin                                                                      | Cancer patients with the AA genotype may have a shorter overall and event-free survival time as compared to patients with the AG or GG genotype when treated with anthracyclines.<br>Patients with osteosarcoma and GG genotype may be at an increased risk of experiencing side effects when treated with cisplatin and doxorubicin as compared to patients with the AA or AG genotypes.                                                                                                                                                                                                                                                                                                                                                                                                                                                                                                                                                                                  |
| CYP1A2 | rs2472304  | 0.00687 | A  | 3   | Erlotinib                                                                                                    | Patients with GG genotype may have decreased concentrations of erlotinib as compared to patients with AA or AG genotype.                                                                                                                                                                                                                                                                                                                                                                                                                                                                                                                                                                                                                                                                                                                                                                                                                                                   |
| DCK    | rs80143932 | 0.04159 | G  | 3   | Cytarabine /<br>Idarubicin                                                                                   | Patients with acute myeloid leukemia and the GG genotype may have an increased response to cytarabine and idarubicin as compared to patients with the CC genotype. Other clinical and genetic factors may also influence response in patients administered cytarabine and idarubicin.                                                                                                                                                                                                                                                                                                                                                                                                                                                                                                                                                                                                                                                                                      |
| DCK    | rs2306744  | 0.04159 | T  | 3   | Cytarabine /<br>Idarubicin                                                                                   | Patients with acute myeloid leukemia and the CC genotype may have a decreased response to cytarabine and idarubicin as compared to patients with the TT genotype. Other clinical and genetic factors may also influence response in patients administered cytarabine and idarubicin.                                                                                                                                                                                                                                                                                                                                                                                                                                                                                                                                                                                                                                                                                       |
| E2F7   | rs310786   | 0.04181 | C  | 3   | Tamoxifen                                                                                                    | Women with the CC genotype and breast cancer may have increased lumbar bone loss when treated with tamoxifen as compared to women with the CT or TT genotype. Other genetic and clinical factors may also influence lumbar bone loss in women taking tamoxifen.                                                                                                                                                                                                                                                                                                                                                                                                                                                                                                                                                                                                                                                                                                            |

|              |             |                      |   |   |                                                                 |                                                                                                                                                                                                                                                                                                                                                                                              |
|--------------|-------------|----------------------|---|---|-----------------------------------------------------------------|----------------------------------------------------------------------------------------------------------------------------------------------------------------------------------------------------------------------------------------------------------------------------------------------------------------------------------------------------------------------------------------------|
| <i>EGFR</i>  | rs712829    | 0.03737              | T | 3 | Erlotinib /<br>Cetuximab /<br>Irinotecan                        | Patients with the GG genotype may be less sensitive to treatment with erlotinib compared to patients with the GT or TT genotype.<br>Patients with GG genotype and colorectal cancer may have a shorter overall survival and progression-free survival time when receiving anti-EGFR plus irinotecan, as compared to patients with GT or TT genotype.                                         |
| <i>FLT4</i>  | rs307821    | 0.01677              | A | 3 | Sunitinib                                                       | Patients with AC genotype and Renal Cell Carcinoma who are treated with sunitinib may have reduced progression-free survival as compared to patients with the CC genotype.                                                                                                                                                                                                                   |
| <i>FOXO1</i> | rs144991623 | 0.00055              | T | 3 | Cyclophosphamide /<br>Epirubicin /<br>Fluorouracil              | Patients with breast cancer and TT genotype may have an increased risk of developing neutropenia when treated with cyclophosphamide, epirubicin and fluorouracil as compared to patients with CC or CT genotypes.                                                                                                                                                                            |
| <i>GSTA1</i> | rs3957357   | 3.87E <sup>-06</sup> | A | 3 | Cisplatin /<br>Cyclophosphamide /<br>Doxorubicin /<br>Rituximab | Patients with the AA or AG genotypes may have increased risk for anemia when treated with cisplatin and cyclophosphamide as compared to patients with the GG genotype.<br>Patients with the GG genotype and diffuse large B-cell lymphoma may have a shorter event-free survival time when treated with the R-CHOP chemotherapy regimen as compared to patients with the AA or AG genotypes. |
| <i>GSTP1</i> | rs1138272   | 0.00167              | T | 3 | Cisplatin                                                       | Patients with the AG or GG genotypes and soft tissue sarcoma may have a shorter progression-free survival time when treated with doxorubicin as compared to patients with the AA genotype.                                                                                                                                                                                                   |
| <i>IRX5</i>  | rs9936750   | 0.00969              | C | 3 | Capecitabine                                                    | Patients with the CT or TT genotypes and cancer may have shorter survival times when treated with cisplatin as compared to patients with the CC genotype.                                                                                                                                                                                                                                    |
| <i>KDR</i>   | rs2239702   | 0.00363              | T | 3 | Sorafenib                                                       | Patients with the CC or CT genotype who are treated with capecitabine may have an increased risk for capecitabine-induced toxicity as compared to patients with the TT genotype.                                                                                                                                                                                                             |
| <i>KDR</i>   | rs2071559   | 0.01892              | G | 3 | Sorafenib                                                       | Patients with the CT or TT genotypes may have unfavorable progression-free survival and overall survival when treated with sorafenib in people with Carcinoma, Renal Cell as compared to patients with genotype CC.                                                                                                                                                                          |
| <i>MAF</i>   | rs4888024   | 0.01556              | A | 3 | Methotrexate                                                    | Patients with AA or AG genotypes may have decreased overall survival and progression-free survival when treated with sorafenib in people with Carcinoma, Renal Cell or hepatocellular carcinoma as compared to patients with the GG                                                                                                                                                          |
| <i>MTRR</i>  | rs1801394   | 0.03266              | G | 3 | Sevoflurane                                                     | Patients with the AA genotype and childhood acute lymphoblastic leukemia who are treated with methotrexate may have a decreased, but not absent, risk of end-of-induction minimal residual disease (MRD) as compared to patients with the AG or GG genotype. Other genetic and clinical factors may also influence a patient's risk for MRD.                                                 |
| <i>MUTYH</i> | rs3219484   | 0.01115              | T | 3 | Cisplatin /<br>Cyclophosphamide                                 | Patients with the rs1801394 GG genotype who are treated with sevoflurane may have decreased mean arterial pressure as compared to patients with the AA genotype. Other genetic and clinical factors may also influence mean arterial pressure.                                                                                                                                               |
| <i>NALCN</i> | rs7992226   | 0.00029              | G | 3 | Methotrexate                                                    | Patients with CC genotype and ovarian cancer who are treated with cisplatin and cyclophosphamide may have an increased risk of grade 3-4 neutropenia as compared to patients with CT genotype.                                                                                                                                                                                               |
|              |             |                      |   |   |                                                                 | Patients with the GG genotype and childhood acute lymphoblastic leukemia (ALL) may have increased exposure to methotrexate and lower likelihood of minimal residual disease as compared to patients with the AA genotype. Other genetic and clinical factors may also influence clearance of methotrexate.                                                                                   |

|                |             |          |   |   |                                                                    |                                                                                                                                                                                                                                                                                                                                                                                       |
|----------------|-------------|----------|---|---|--------------------------------------------------------------------|---------------------------------------------------------------------------------------------------------------------------------------------------------------------------------------------------------------------------------------------------------------------------------------------------------------------------------------------------------------------------------------|
| <i>NCF4</i>    | rs1883112   | 0.04821  | G | 3 | Doxorubicin /<br>Idarubicin                                        | Cancer patients with AA genotype who are treated with doxorubicin or idarubicin may have an increased risk for cardiotoxicity as compared to patients with AG and GG genotype.                                                                                                                                                                                                        |
| <i>NFKB1A</i>  | rs2233409   | 0.03819  | A | 3 | Gefitinib                                                          | Patients with non-small cell lung cancer and the AA genotype may be at an increased risk of developing diarrhea when treated with gefitinib as compared to patients with the AG or GG genotypes.                                                                                                                                                                                      |
| <i>NOS3</i>    | rs1799983   | 0.00690  | T | 3 | Cyclophosphamide /<br>Doxorubicin /<br>Fluorouracil /<br>Sorafenib | Patients with TT genotype may have shorter disease-free survival when treated with cyclophosphamide-based regimens, as compared to patients with the GG or GT genotype.<br>Hepatocellular Carcinoma patients with GG genotype may have decreased progression-free survival and decreased overall survival when treated with sorafenib as compared to patients with genotype GT or TT. |
| <i>OTOS</i>    | rs2291767   | 0.001321 | C | 3 | Cisplatin                                                          | Cancer patients with the TT genotype may have an increased risk of ototoxicity when treated with cisplatin as compared to patients with the CC or CT genotypes.                                                                                                                                                                                                                       |
| <i>PACSLN2</i> | rs2413739   | 0.03201  | T | 3 | Mercaptopurine                                                     | Patients with Precursor Cell Lymphoblastic Leukemia-Lymphoma and TT genotype may have increased risk of adverse events when treated with mercaptopurine as compared to patients with the CC or CT genotypes.                                                                                                                                                                          |
| <i>PARD3B</i>  | rs17626122  | 0.00017  | T | 3 | Fluorouracil /<br>Oxiplatin                                        | Patients with the CT or TT genotypes may have increased likelihood of Drug Toxicity when treated with fluorouracil and oxaliplatin in people with Colorectal Neoplasms as compared to patients with genotype CC.                                                                                                                                                                      |
| <i>PERP</i>    | rs117101815 | 0.01703  | T | 3 | Cyclophosphamide /<br>Epirubicin /<br>Fluorouracil                 | Patients with breast cancer and GG or GT genotypes may have an increased risk of developing neutropenia when treated with cyclophosphamide, epirubicin and fluorouracil as compared to patients TT genotype.                                                                                                                                                                          |
| <i>PERP</i>    | rs9402944   | 0.01703  | T | 3 | Cyclophosphamide /<br>Epirubicin /<br>Fluorouracil                 | Patients with breast cancer and GG or GT genotypes may have an increased risk of developing neutropenia when treated with cyclophosphamide, epirubicin and fluorouracil as compared to patients TT genotype.                                                                                                                                                                          |
| <i>PERP</i>    | rs78428806  | 0.01921  | A | 3 | Cyclophosphamide /<br>Epirubicin /<br>Fluorouracil                 | Patients with breast cancer and GG genotype may have an increased risk of developing neutropenia when treated with cyclophosphamide, epirubicin and fluorouracil as compared to patients with AA or AG genotypes.                                                                                                                                                                     |
| <i>PIN1</i>    | rs2233678   | 0.0166   | C | 3 | Irinotecan /<br>Oxaliplatin                                        | Patients with the GG genotype and colorectal cancer may have decreased survival times when treated with irinotecan-based treatments as compared to patients with the CC or CG genotypes.<br>Patients with the CC or CG genotypes and colorectal cancer may have decreased survival times when treated with oxaliplatin-based treatments as compared to patients with the GG genotype. |
| <i>RXRA</i>    | rs62576288  | 0.04187  | A | 3 | Docetaxel                                                          | Patients with nasopharyngeal cancer and the GG genotype who are treated with docetaxel may have more severe anemia as compared to the AA genotype.                                                                                                                                                                                                                                    |
| <i>SLC22A4</i> | rs1050152   | 0.03541  | T | 3 | Imatinib                                                           | Patients with the TT genotype and cancer may have a poorer response to treatment with imatinib as compared to patients with the CC or CT genotype.                                                                                                                                                                                                                                    |
| <i>SLC31A1</i> | rs4979223   | 0.01361  | A | 3 | Platinum<br>Compounds                                              | Patients with the AC genotype and non-small cell lung cancer who are treated with platinum compounds may have increased severity of thrombocytopenia, and decreased likelihood of overall survival as compared to patients with AA or CC genotypes.                                                                                                                                   |
| <i>SLC31A1</i> | rs10981694  | 0.03863  | G | 3 | Cisplatin                                                          | Patients with the GG or GT genotypes and NSCLC who are treated with cisplatin may have an increased risk of severe ototoxicity as compared to patients with the TT genotype.                                                                                                                                                                                                          |



|                |           |         |   |   |                                                                         |                                                                                                                                                                                                                                                                                                                                                                                                                  |
|----------------|-----------|---------|---|---|-------------------------------------------------------------------------|------------------------------------------------------------------------------------------------------------------------------------------------------------------------------------------------------------------------------------------------------------------------------------------------------------------------------------------------------------------------------------------------------------------|
| <i>SLC31A1</i> | rs7851395 | 0.04876 | A | 3 | Carboplatin /<br>Cisplatin                                              | Patients with the AG or GG genotypes may have decreased overall survival when treated with carboplatin or cisplatin in people with Non-Small-Cell Lung Carcinoma as compared to patients with genotypes AA.                                                                                                                                                                                                      |
| <i>TNFAIP3</i> | rs6920220 | 0.01505 | A | 3 | Methotrexate                                                            | Patients with the AA genotype may have increased likelihood of discontinuation of methotrexate in people with Arthritis as compared to patients with genotype GG. Other genetic and clinical factors may also influence the response to methotrexate.                                                                                                                                                            |
| <i>UBE2I</i>   | rs9597    | 0.00225 | G | 3 | Cisplatin / Irinotecan                                                  | Patients with the CC genotype may have a decreased response to cisplatin and irinotecan as compared to patients with the CG or GG genotypes.                                                                                                                                                                                                                                                                     |
| <i>XPC</i>     | rs2228001 | 0.00886 | G | 3 | Cisplatin                                                               | Patients with bladder cancer and the GG or GT genotypes may be at an increased risk of developing neutropenia when treated with cisplatin as compared to patients with the TT genotype.                                                                                                                                                                                                                          |
| <i>XRCC3</i>   | rs861539  | 0.03847 | A | 3 | Fluorouracil /<br>Irinotecan /<br>Leucovorin /<br>Platinum<br>Compounds | Patients with bladder cancer and the GG or GT genotypes may be at an increased risk of experiencing drug toxicity when treated with cisplatin as compared to patients with the TT genotype.<br>Patients with GG genotype may have decreased progression free survival in people with colorectal cancer when treated with fluorouracil, irinotecan and leucovorin as compared to patients with AA or AG genotype. |
| <i>XYLT2</i>   | rs6504649 | 0.02611 | G | 3 | Carboplatin /<br>Gemcitabine                                            | Patients with the GG genotype and non-small cell lung cancer may have a worse response when treated with platinum compounds as compared to patients with the AA or AG genotypes.<br>Patients with non-small cell lung cancer and CG or GG genotype may experience an increased severity of thrombocytopenia when treated with carboplatin and gemcitabine as compared to patients with CC genotype.              |

MA: minor allele; LoE: level of evidence; SNP: single nucleotide polymorphism. P\*; P-value for the association between the pharmacogene SNPs genotypes and the European ancestry.
